# Supplementary material
Source: publisher figshare collection journal article supplement (https://acs.figshare.com/ndownloader/files/22773068)
Supplement: Supplementary file 1 [file 22773068]

## Sheet: A. Passive samplers
Concentration in ng/L
COMPOUND	ES (mean values)				TC1 (mean values)				TC2 (mean values)				NP (mean values)
	SPRING	SUMMER	FALL	WINTER	SPRING	SUMMER	FALL	WINTER	SPRING	SUMMER	FALL	WINTER	SPRING	SUMMER	FALL	WINTER
NAP	6.555	2.47667	nd	4.215	4.28	3.87667	1.43	5.29	3.56	4.43	4.295	1.935	3.2	3.535	0.715	4.87667
ACE	nd	nd	nd	1.41	1.53	nd	0.125	0.566667	0.403333	0.27	0.74	0.68	0.3	0.2	0.3	0.6
ACY	1.76	0.526667	0.85	1.39	0.593333	0.726667	0.315	1.26333	0.363333	0.266667	0.435	0.42	0.295	0.216667	0.315	1.47667
ANT	2.025	0.943333	1.645	nd	6.23	0.21	0.155	0.78	0.13	0.233333	0.44	0.28	0.165	0.16	0.27	10.53
FLO	8.365	6.73333	6.34	5.5	0.545	1.18667	0.545	1.38333	1.485	2.14333	1.245	0.755	1.385	0.713333	1.06	2.46333
PHE	9.545	4.72333	8.44	15.34	1.08333	0.836667	1.8	7.18333	1.92667	1.37333	4.81	6.65	2.07	1.78333	4.405	9.44667
PYR	5.69	4.12	3.865	1.985	1.09333	1.01333	0.535	1.13667	1.36333	1.58667	1.65	1.62	0.85	1.05667	1.52	1.06333
CHR	1.285	0.67	0.535	0.385	0.1	0.225	0.125	0.285	0.33	0.486667	0.33	0.32	0.345	0.323333	0.315	0.275
BaA	0.395	0.216667	0.285	0.135	0.175	0.125	0.1	0.5	0.176667	0.193333	0.27	0.26	0.085	0.103333	0.17	0.206667
FLO	3.095	1.82	2.335	1.755	0.676667	0.943333	0.715	1.45	1.15333	1.15667	1.98	2.2	1.95	1.64667	2.155	2.51
BbF	0.29	0.226667	0.18	0.085	0.105	0.17	0.1	0.146667	0.216667	0.356667	0.225	0.16	0.21	0.203333	0.195	0.105
BkF	0.105	0.113333	0.14	nd	0.07	0.075	0.095	0.085	0.135	0.275	0.155	0.13	0.09	0.0933333	0.15	0.11
BaP	0.115	nd	0.255	nd	0.14	0.06	0.085	0.085	0.095	0.13	0.245	0.15	0.14	0.1	0.21	0.1
BghiP	0.07	nd	0.06	nd	0.055	nd	0.05	0.035	0.08	nd	0.055	0.05	0.12	0.05	0.05	0.05
IcdP	nd	nd	0.08	nd	0.06	0.07	0.07	0.07	0.05	nd	0.085	0.06	0.02	nd	0.085	0.06
PCB52	0.14	0.0733333	0.115	nd	0.015	0.03	0.02	0.01	nd	0.06	nd	nd	0.05	0.05	0.05	nd
PCB101	0.07	0.06	0.07	0.03	0.00666667	0.02	0.015	0.0166667	0.05	0.09	0.065	nd	0.08	0.0666667	0.075	nd
PCB138	0.1	0.1	0.1	0.045	0.02	0.0266667	0.035	0.0266667	0.135	0.166667	0.125	0.08	0.085	0.0966667	0.095	0.05
PCB180	nd	0.0233333	0.02	0.02	nd	0.01	0.015	0.015	0.05	0.09	nd	nd	nd	nd	nd	nd
Irgarol	13.8	10.9433	1.98	0.69	3.09667	5.71667	1.105	0.49	4.81667	5.94	4.05	3.48	2.5	2.18667	1.52	0.345
TPP	17.165	6.77	17.88	18.285	0.613333	0.593333	1.175	1.94667	0.843333	0.943333	3.465	3.82	2.79	1.12667	7.52	5.61667
TisoBP	7.01	2.77	3.975	4.395	0.505	0.163333	0.16	0.54	1.015	0.665	0.695	0.77	1.75	0.513333	1.115	0.87
TnBP	3.1	1.04	2.66	4.08	0.47	0.09	0.095	0.23	0.43	0.25	0.255	0.37	0.77	0.323333	0.42	0.663333
TEHP	0.18	0.0533333	0.09	0.07	0.33	0.05	0.08	0.07	0.06	0.2	0.06	nd	0.315	nd	nd	0.12
EHDP	13.835	6.67333	10.74	10.875	4.54	4.17667	2.98	6.68667	6.30333	12.19	18	11.74	1.19	4.21667	2.355	6.13
TTP	0.87	nd	nd	0.295	0.1	nd	nd	0.24	0.12	nd	nd	nd	0.09	nd	nd	0.13
2-OHBP	1.14	19.75	0.21	0.98	0.055	7.38	0.075	nd	0.215	13.26	0.32	nd	1.245	5.17	2.26	0.835
BP-3	71.535	110.85	15.455	30.325	10.7233	67.81	5.855	5.92667	9.20667	11.8367	8.475	15.7	18.16	32.7033	3.385	6.00333
OC	92.45	135.21	37.155	47.815	33.1333	146.127	19.19	7.21333	23.625	21.9867	9.045	8.93	25.55	25.47	7	4.335
HMS	2.915	14.0033	0.525	3.73	0.73	11.43	0.34	0.71	1.17	0.246667	0.42	0.71	0.465	1.57333	nd	0.205
EHS	4.98	14.8533	13.565	2.65	1.09333	12.0433	3.275	1.175	1.98	0.705	1.195	1.65	1.01	1.94	1.54	0.675
EHMC	10.935	2.93667	2.87	1.335	4.73	4.04333	1.235	0.663333	3.98333	2.86333	1.645	1.44	6.35	24.9033	1.41	0.445
4-MBC	18.975	47.34	14.545	7.85	5.84	29.98	5.395	7.24	6.6	15.0333	13.36	4.56	7.7	8.24	6.565	7.505
MX	24.27	9.17333	35.27	59.855	1.58	nd	1.17	2.80667	1.58333	nd	3.225	8.6	nd	nd	1.015	3.84
MK	33.005	12.9767	112.79	141.915	1.44667	0.363333	2.5	12.0867	1.81333	1.35	5.835	20.92	0.785	0.45	2.35	5.90667
HHCB	316.38	401.94	446.485	2969.05	26.43	8.62667	24.15	95.9333	22.6633	28.0733	71.505	146.54	19.54	10.2067	34.89	32.9533
AHTN	52.13	33.76	94.635	178.75	1.73667	0.666667	1.935	8.76	2.35667	4.85667	9.335	17.56	2.04	1.34333	3.09	4.86667
ADBI	2.08	0.596667	1.335	3.96	nd	nd	nd	0.195	nd	nd	0.18	0.34	nd	nd	0.055	0.26
OTNE	372.955	161.347	628.14	1825.89	6.17	3.13	6.515	43.95	12.2967	21.02	48.455	148.1	7.085	6.88667	13.99	29.5467
TCS	28.385	56.1867	71.8	92.69	9.98667	2.53333	6.225	14.52	8.38667	2.34667	8.67	31.33	8.375	3.33	5.365	12.605
Me-TCS	3.155	1.18333	1.93	1.245	0.0966667	0.065	0.175	0.316667	0.07	0.105	0.27	0.31	0.17	0.0966667	0.295	0.19
NP	43.1	13.07	74.88	156.32	3.24	4.46	13.31	5.235	22.2667	1.56	13.7	22.35	10.125	4.22	6.175	5.91

## Sheet: B. Clams
Concentration in ng/g dw
COMPOUND	ES (mean values)				TC1 (mean values)				TC2 (mean values)				NP (mean values)
	SPRING	SUMMER	FALL	WINTER	SPRING	SUMMER	FALL	WINTER	SPRING	SUMMER	FALL	WINTER	SPRING	SUMMER	FALL	WINTER
NAP	5.51075	1.62262	2.65569	1.62881	5.12433	3.32581	3.33925	4.70325	1.868	1.07725	1.29238	2.38775	2.82038	5.74754	2.46769	3.50619
ANT	2.61338	1.97294	1.73806	1.65244	1.72158	0.915937	0.964687	1.83481	0.752125	1.7315	1.91237	6.139	1.12262	1.32125	1.28638	1.43081
FLU	nd	nd	0.58	nd	nd	nd	nd	nd	12.36	0.22	1.22	0.88	nd	0.56	1.39	nd
PHE	7.8135	6.67606	10.2966	6.98394	8.23783	5.71012	6.858	10.0443	2.377	3.0715	4.42525	4.6145	6.332	7.54371	7.42444	8.09337
PYR	5.8335	6.41587	7.06738	8.55081	18.2295	2.84488	3.25356	3.89775	4.681	8.79508	45.5153	5.70575	4.01887	5.74721	3.41831	2.19588
CHR	14.9654	3.37437	4.551	4.85206	9.28767	2.10044	4.37175	7.3365	1.3125	nd	1.2945	3.3805	4.58587	5.81025	3.96625	5.16569
BA	6.17375	1.61062	1.52225	2.0875	3.85017	0.833687	2.23369	2.92512	2.4975	3.73633	7.68781	8.04225	2.63462	2.05446	1.63275	1.14931
FLA	4.66287	3.19675	4.60587	3.66025	7.65663	2.64825	2.72294	5.03406	2.3455	2.8285	2.05844	9.17638	3.3405	3.82296	2.89681	3.77419
BbF	1.1255	0.419	0.398938	0.284875	nd	nd	nd	nd	1.163	1.31725	0.89975	13.5285	nd	nd	nd	nd
BaP	nd	nd	nd	nd	nd	nd	nd	nd	nd	nd	l	11.8	1.15762	2.18942	2.07112	1.34019
PCB 52	nd	0.154438	0.164438	0.038625	0.430708	0.349187	0.275625	0.468187	1.96225	2.15825	nd	5.66725	0.385375	0.355292	0.335875	0.322625
PCB 101	0.99525	1.15969	0.99475	0.933375	0.492125	0.394188	0.409687	0.3785	0.6225	1.3375	0.83475	0.745	0.592	0.590625	0.443625	0.472
PCB 138	1.83312	2.32419	1.9895	1.03731	1.58404	1.15444	1.14381	0.7655	3.26175	2.82025	2.03912	5.3155	1.66613	1.32721	1.17681	1.30212
PCB 180	1.491	1.20269	1.15738	1.32238	0.678188	0.241438	0.381312	0.591375	1.0955	1.589	1.21562	1.06925	0.2735	0.282875	0.512687	0.029375
Irgarol	nd	nd	nd	nd	22.2	106	15.4	28.7	63.3	44.5333	67.5	15.23	nd	22.95	11.2	13.3
TPP	27.5929	20.9519	8.57906	18.6264	nd	nd	nd	nd	nd	5.5	2.19	nd	6.44538	4.87383	5.73994	4.241
TiBP	1.18363	0.980438	2.20631	0.542	1.32642	0.55	0.988125	nd	1.3955	1.31275	2.05713	4.67575	0.866	1.382	1.10794	0.600187
TnBP	7.74338	6.21544	6.11362	3.02956	6.2	3.85675	4.63969	3.305	3.28675	3.68575	5.0775	3.7735	4.08212	3.70496	6.29775	2.38187
BP-3	1.9545	3.59356	2.35338	3.73225	2.45825	nd	5.77163	1.41156	1.02975	2.14025	1.305	2.393	2.72962	1.62904	1.38744	1.07825
OC	23.2186	13.237	24.6777	52.3377	37.1332	22.7716	46.0719	4.29519	13.6894	87.3009	35.1199	17.1773	18.3685	23.1975	23.7957	3.86369
EHMC	23.161	21.7134	32.1876	18.5111	58.6548	36.7551	21.6363	12.1717	1.34225	14.933	7.75944	5.0325	44.341	32.0044	28.1831	12.5682
HHCB	41.9569	18.2629	37.4818	46.0381	27.34	10.6099	24.2482	32.4761	26.3106	62.2989	75.0772	41.2892	15.1351	36.2986	30.9042	22.1687
AHTN	16.4765	5.35281	11.4062	9.9345	9.06842	3.23787	7.14375	6.21113	6.97475	0.1	5.1645	6.9295	7.44925	8.29262	14.1122	4.50856
OTNE	35.9631	24.4552	34.1714	18.5849	38.5975	24.6294	34.4789	42.7726	24.9281	41.3279	30.7621	74.7082	25.9695	35.5969	37.5392	37.0023
TCS	11.6967	5.412	7.37131	4.57287	nd	nd	nd	nd	4	2.31487	11.8268	1.79525	5.56875	6.13225	6.50894	4.54225
Me-TCS	0.8365	1.55169	1.40512	1.18381	0.589083	0.533	0.546	0.561937	0.773	0.75325	0.794875	0.83625	0.4995	0.409625	0.3895	0.59875
NP	67.105	49.5051	81.0322	44.9852	61.7632	12.185	38.1749	48.9143	13.84	37.0733	22.115	90.02	67.43	93.2639	77.1506	73.6358

## Sheet: C. log BAF
Log BAF data (L/kg)
log BAF	ES (mean values)				TC1 (mean values)				TC2 (mean values)				NP (mean values)
	SPRING	SUMMER	FALL	WINTER	SPRING	SUMMER	FALL	WINTER	SPRING	SUMMER	FALL	WINTER	SPRING	SUMMER	FALL	WINTER
Naphtalene	3.14571	3.14947	-	2.61597	3.3723	3.71365	3.41117	2.98006	2.73959	2.28646	2.59025	3.21067	2.97797	3.90256	3.56117	2.74984
Anthracene	3.39601	3.37381	3.02864	-	3.26557	3.64446	3.79169	3.53839	3.71863	3.71467	3.76306	4.58425	3.83964	3.83228	3.67095	3.28181
Fluorene		-	2.20713	-	-	-	-	-	4.05459	2.36929	3.04497	3.68921	-	2.90934	3.07856	-
Phenantrene	3.12199	3.35781	3.10377	2.6493	3.8567	3.81196	3.60387	2.97918	3.08156	3.2493	2.76131	2.69569	3.44951	3.58558	3.26923	2.7651
Pyrene	3.0784	3.36838	3.26123	3.62253	3.98154	3.47718	3.77823	3.5016	3.7952	3.80391	4.06495	3.22185	3.66892	3.69271	3.33475	3.08925
Chrysene	4.2257	3.75734	3.92008	4.0937	5.35235	3.97025	4.51739	4.40215	5.1181	-	3.63498	-	4.16998	4.24631	4.07304	4.24759
Benz[a]anthracene	4.46833	3.90498	3.69299	4.1735	4.72528	3.79908	4.3228	4.2099	4.13082	4.29358	4.38279	-	4.51997	4.29746	3.93699	3.94923
Fluoranthene	3.21995	3.23609	3.29126	3.31238	4.15862	3.46931	3.56255	3.36939	3.75745	3.1593	3.03274	3.77152	3.22469	3.33384	3.11819	3.15375
Benzo[b]fluoranthene	3.84723	3.17314	3.10072	3.44219		-	-	-	4.06558	3.33434	3.59239	5.19033	-	-	-	-
Benzo(a)pyrene	-	-	-	-	-	-	-	-	-	-	-	4.89579	3.89129	4.52065	4.01215	3.93203
PCB 52	-	3.3364	3.15157	-	4.45406	4.00207	4.12377	4.72448	-	4.55595	5.17594	-	3.99715	3.95195	3.82721	-
PCB 101	4.29896	4.26204	4.15144	4.48994	4.60805	4.29219	4.42783	4.42732	4.31059	4.3246	4.10575	-	4.01864	3.95242	3.7654	4.19682
PCB 138	4.41809	4.34953	4.29872	4.15944	4.9043	4.52225	4.46356	4.40144	5.21242	4.01892	4.16332	5.05595	4.29366	4.12241	4.08177	4.41568
PCB 180	-	4.691	4.76108	4.82032	-	3.97798	4.41547	4.47083	4.09691	4.08718	4.48274	-	-	4.14652	4.40879	3.31632
Irgarol	-	-	-	-	4.37334	4.18962	4.21439	4.67405	4.85603	4.03466	4.16279	-	-	3.99807	3.8397	4.67669
TPP	3.47419	3.86597	2.58234	3.02169	-	-	-	-	-	4.78612	2.58078	-	3.36759	3.61916	2.96611	3.29909
TisoBP	2.33602	2.70348	2.69181	2.09108	3.28458	3.39794	3.81872	-	-	3.08076	3.58898	-	2.697	3.39784	3.00778	2.66891
TnBP	3.50872	4.025	3.35965	2.87608	4.13373	4.62014	4.68433	4.07256	-	4.16859	4.38343	-	3.73689	4.02386	4.14154	3.68672
BP-3	1.5241	1.62292	2.04047	2.09225	2.12345	-	3.12181	2.24873	2.96474	2.17188	2.19088	-	2.05875	1.73624	2.6243	2.01527
OC	2.4692	1.91866	2.82202	2.94146	3.12095	2.20243	3.33338	2.55545	2.76624	3.69893	3.4213	3.43831	2.83884	2.53939	3.48512	2.98133
EHMC	3.52843	4.02266	4.01002	4.16631	4.1183	3.89689	4.30903	4.2859	3.58377	3.79734	3.66585	-	3.62234	3.70428	4.30452	4.18718
Galaxolide	2.26365	2.10836	1.91447	1.1751	3.0237	3.06962	2.98473	2.63311	3.03864	2.56898	2.80838	2.24058	2.88531	3.35057	2.98869	2.95742
Tonalide	2.67779	2.47007	2.08035	1.72883	3.55006	3.70333	3.59417	2.79932	3.56695	1.03245	2.32606	-	3.55409	3.66978	3.66107	2.76449
OTNE	2.2128	2.4084	1.73947	1.15104	3.72912	3.794	3.79261	2.93514	3.50756	3.2836	2.84314	2.80026	3.33063	3.66593	3.44637	2.96245
TCS	2.68407	2.16114	1.97381	1.68959	-	-	-	-	2.58253	3.33569	3.28896	-	2.81056	3.24903	3.07099	2.42938
Me-TCS	2.46762	3.16091	2.86148	2.9862	3.80277	3.91504	3.4974	3.25625	4.11003	3.83555	3.46894	-	3.47495	3.63113	3.0941	3.39703
NP	3.33052	3.86086	3.03533	2.46177	4.06076	3.66391	3.48427	3.97512	3.17767	3.39234	3.42472	3.84855	3.81993	3.80106	4.2116	3.71688
*only calculated when Cw and Cclams are available
